# Supplementary material
Source: HighWire-hosted journal article supplement (https://bmjopen.bmj.com/content/7/12/e019321)
Supplement: inline-supplementary-material-1 [file inline-supplementary-material-1.pdf]

## **Appendix 1. Representative Search Strategy**

### ***Hematologic malignancies:***

Database: Embase Classic+Embase, EBM Reviews - Cochrane Central Register of Controlled Trials, Ovid MEDLINE(R) Epub Ahead of Print, In-Process & Other Non-Indexed Citations, Ovid MEDLINE(R) Daily and Ovid MEDLINE(R).

Search Strategy:

- 1 ((chimeric antigen adj2 receptor\*) and (therap\* or treat\* or immunity or immunotherap\* or cell\*)).tw.
- 2 ((car adj3 t adj5 therap\*) or (car adj3 t adj5 treat\*)).tw.
- 3 (car adj3 t adj3 immunotherap\*).tw.
- 4 (car therap\* or (car adj2 t adj2 cell\*)).tw.
- 5 ((modified or engineered) adj2 (t cell\* or t lymphocyte\*)).tw.
- 6 chimeric antigen receptor/
- 7 or/1-6
- 8 (h?ematolog\* cancer\* or lymphoid malignanc\* or b cell malignan\* or h?ematolog\* neoplasm\* or h?ematolog\* malignanc\* or lymphoma\* or leuk?emi\* or myeloma\* or nonhodgkin\* or non hodgkin\* or t cell malignan\*).tw.
- 9 hematologic malignancy/ or exp lymphoma/ or exp leukemia/ or exp multiple myeloma/

***Solid tumors:***

Database: Embase Classic+Embase, EBM Reviews - Cochrane Central Register of Controlled Trials, Ovid MEDLINE(R) Epub Ahead of Print, In-Process & Other Non-Indexed Citations, Ovid MEDLINE(R) Daily and Ovid MEDLINE(R).

Search Strategy:

- 1 ((chimeric antigen adj2 receptor\*) and (therap\* or treat\* or immunity or immunotherap\* or cell\*)).tw.
- 2 ((car adj3 t adj5 therap\*) or (car adj3 t adj5 treat\*)).tw.
- 3 (car adj3 t adj3 immunotherap\*).tw.
- 4 (car therap\* or (car adj2 t adj2 cell\*)).tw.
- 5 ((modified or engineered) adj2 (t cell\* or t lymphocyte\*)).tw.
- 6 chimeric antigen receptor/
- 7 or/1-6
- 8 exp solid tumor/
- 9 (solid adj (tumor\* or malignan\* or cancer)).tw.
- 10 exp breast cancer/
- 11 exp colon cancer/
- 12 exp rectum cancer/

- 13 colorectal cancer/
- 14 exp kidney cancer/
- 15 exp lung cancer/
- 16 exp prostate cancer/
- 17 exp pancreas cancer/
- 18 exp bladder cancer/
- 19 ((breast or lung or rect\* or colorect\* or colon or prostat\* or renal or kidney or bladder or pancrea\*) adj2 (cancer\* or neoplasm\* or carcinoma\* or tumo?r\*)).tw.
- 20 exp skin cancer/ or cutaneous melanoma/
- 21 (Skin adj2 (cancer or neoplasm\*)).tw.
- 22 melanoma.tw.
- 23 brain cancer/
- 24 (brain adj2 (cancer or neoplasm\* or tum?or\*)).tw.
- 25 (glioma\* or glioblastoma\*).tw.
- 26 exp sarcoma/
- 27 sarcoma.tw.
- 28 malignant mesothelioma/
- 29 mesothelioma.tw.

30 liver cancer/

31 ((liver or hepatic or Hepatocellular) adj2 (cancer\* or neoplasm\* or carcinoma\* or  
tumo?r\*)).tw.
