# Supplementary material
Source: HighWire-hosted journal article supplement (https://bmjopen.bmj.com/content/7/12/e019321)
Supplement: inline-supplementary-material-2 [file inline-supplementary-material-2.pdf]

## Appendix 2. Modified Institute of Health Economics Tool

| Question Text                                                                                                                                                                                                                                                                                                                                                                                                                                                                                                                                                                                                            | Answer Text      |
|--------------------------------------------------------------------------------------------------------------------------------------------------------------------------------------------------------------------------------------------------------------------------------------------------------------------------------------------------------------------------------------------------------------------------------------------------------------------------------------------------------------------------------------------------------------------------------------------------------------------------|------------------|
| Was the hypothesis/ aim/ objective of the study stated?<br>Yes = The hypothesis/aim/objective was reported (includes patients, intervention and outcome).<br>Partial/ unclear = Only one or two components (patients, intervention, or outcome) were included.<br>No = The hypothesis/aim/ objective was not reported.                                                                                                                                                                                                                                                                                                   | Yes              |
|                                                                                                                                                                                                                                                                                                                                                                                                                                                                                                                                                                                                                          | Partial/ unclear |
|                                                                                                                                                                                                                                                                                                                                                                                                                                                                                                                                                                                                                          | No               |
| Was the study conducted prospectively?<br>Yes = It was clearly stated that the study was conducted prospectively.<br>Partial/ unclear = Unclear or no information was provided.<br>No = The study clearly stated it was a retrospective study.                                                                                                                                                                                                                                                                                                                                                                           | Yes              |
|                                                                                                                                                                                                                                                                                                                                                                                                                                                                                                                                                                                                                          | Partial/ unclear |
|                                                                                                                                                                                                                                                                                                                                                                                                                                                                                                                                                                                                                          | No               |
| Were patients from more than one centre?<br>For example, you can deduce single centre if they state "Data was taken from the Sloan Memorial Research Centre".<br>Yes = Patients were from more than one centre (multicentre study).<br>Partial/ unclear = Unclear where the patients came from.<br>No = Patients were from one centre.                                                                                                                                                                                                                                                                                   | Yes              |
|                                                                                                                                                                                                                                                                                                                                                                                                                                                                                                                                                                                                                          | Partial/ unclear |
|                                                                                                                                                                                                                                                                                                                                                                                                                                                                                                                                                                                                                          | No               |
| Were patients recruited consecutively?<br>Note: Not based on previously published protocols. Must be stated in this paper.<br>Yes = There was a clear statement or it was clear from the context that the patients were recruited consecutively; or the study stated that all eligible patients were recruited.<br>Partial/ unclear = No information was provided about the method used to recruit patients in the study.<br>No = The study clearly stated that patients were not recruited consecutively; or the patients were recruited based on other criteria such as access to intervention.<br>N/A = N of 1 study. | Yes              |
|                                                                                                                                                                                                                                                                                                                                                                                                                                                                                                                                                                                                                          | Partial/ unclear |
|                                                                                                                                                                                                                                                                                                                                                                                                                                                                                                                                                                                                                          | No               |
|                                                                                                                                                                                                                                                                                                                                                                                                                                                                                                                                                                                                                          | N/A              |
| Were the eligibility criteria (i.e. inclusion and exclusion criteria) for entry into the study clearly stated?<br>Note: Not based on previously published protocols. Must be stated in this paper.<br>Yes = Both inclusion and exclusion criteria were reported.                                                                                                                                                                                                                                                                                                                                                         | Yes              |

|                                                                                                                                                                                                                                                                                                                                                                                                                                                                         |                  |
|-------------------------------------------------------------------------------------------------------------------------------------------------------------------------------------------------------------------------------------------------------------------------------------------------------------------------------------------------------------------------------------------------------------------------------------------------------------------------|------------------|
| Partial/ unclear = Either inclusion OR exclusion were reported.<br>No = Neither inclusion nor exclusion criteria were reported.                                                                                                                                                                                                                                                                                                                                         |                  |
|                                                                                                                                                                                                                                                                                                                                                                                                                                                                         | Partial/unclear  |
|                                                                                                                                                                                                                                                                                                                                                                                                                                                                         | No               |
| Were the characteristics of the patients included in the study described?<br>Relevant characteristics: age, sex, malignancy type, lymphodepletion, previous treatment, concomitant treatments, co-morbidities.<br>Yes = All of the relevant patient characteristics were reported.<br>Partial/ unclear = $\geq 1$ of the relevant characteristics were reported.<br>No = None of the relevant characteristic were reported.                                             | Yes              |
|                                                                                                                                                                                                                                                                                                                                                                                                                                                                         | Partial/ unclear |
|                                                                                                                                                                                                                                                                                                                                                                                                                                                                         | No               |
| Did patients enter the study at a similar point in the disease?<br>Yes = The paper states that entering patients are in relapsed/ refractory setting.<br>Partial/ unclear = There was no baseline information on patients' characteristics to make a judgment.<br>No = There was a wide range in the severity of the disease and co-morbidities of patients at baseline.<br>N/A = N of 1 study.                                                                         | Yes              |
|                                                                                                                                                                                                                                                                                                                                                                                                                                                                         | Partial/ unclear |
|                                                                                                                                                                                                                                                                                                                                                                                                                                                                         | No               |
|                                                                                                                                                                                                                                                                                                                                                                                                                                                                         | N/A              |
| Was the intervention of interest described?<br>Relevant characteristics:<br>T-cell origin, CD configuration (type (i.e. CD19), co-stimulatory domain(s), dosage regimen (dose, frequency, duration).<br>Yes = All of the relevant characteristics of the intervention were reported.<br>Partial/unclear = Some of the relevant characteristics of the intervention were reported.<br>No = None of the relevant characteristics of the intervention were reported.       | Yes              |
|                                                                                                                                                                                                                                                                                                                                                                                                                                                                         | Partial/unclear  |
|                                                                                                                                                                                                                                                                                                                                                                                                                                                                         | No               |
| Were additional interventions clearly described?<br>i.e. chemotherapy, HSCT, radiation.<br>Yes = All of the most relevant characteristics (type, dose, frequency administration, duration) of the co-intervention were reported<br>Partial/ unclear = Some but not all of the most relevant characteristics of the co-intervention were reported.<br>No = No information about the co-intervention was provided; or only the name of the co-intervention was mentioned. | Yes              |
|                                                                                                                                                                                                                                                                                                                                                                                                                                                                         | Partial/ unclear |

|                                                                                                                                                                                                                                                                                                                                                                                                                                                                                                                                                                                                                                                                                      |                  |
|--------------------------------------------------------------------------------------------------------------------------------------------------------------------------------------------------------------------------------------------------------------------------------------------------------------------------------------------------------------------------------------------------------------------------------------------------------------------------------------------------------------------------------------------------------------------------------------------------------------------------------------------------------------------------------------|------------------|
|                                                                                                                                                                                                                                                                                                                                                                                                                                                                                                                                                                                                                                                                                      | No               |
| <p>Were relevant outcome measures established a priori in the introduction or methods section?</p> <p>Yes = All relevant outcome measures were stated.</p> <p>Partial/ unclear = Some, but not all of the relevant outcome measures were stated.</p> <p>No = None of the relevant outcome measures were stated.</p>                                                                                                                                                                                                                                                                                                                                                                  | Yes              |
|                                                                                                                                                                                                                                                                                                                                                                                                                                                                                                                                                                                                                                                                                      | Partial/ unclear |
|                                                                                                                                                                                                                                                                                                                                                                                                                                                                                                                                                                                                                                                                                      | No               |
| <p>Were outcome assessors blinded to the intervention that patients received?</p> <p>i.e. Did the study have 'independent outcome assessors'?</p> <p>Yes = The outcomes were assessed by individuals who were not aware of patient intervention.</p> <p>- SELECT where blinding is not necessary. i.e. Mortality is the outcome.</p> <p>- SELECT where the blinding to the outcome does not influence the assessment. i.e. Response to CAR-T.</p> <p>Partial/ unclear = The study did not report whether the outcome assessors were aware of the intervention.</p> <p>No = It was clearly stated or obvious from the context that individuals assessing outcomes were unblinded.</p> | Yes              |
|                                                                                                                                                                                                                                                                                                                                                                                                                                                                                                                                                                                                                                                                                      | Partial/ unclear |
|                                                                                                                                                                                                                                                                                                                                                                                                                                                                                                                                                                                                                                                                                      | No               |
| <p>Were the relevant outcomes measured using appropriate objective or subjective methods?</p> <p>Yes = Complete response/remission and <math>\geq 1</math> secondary outcomes (i.e, overall response rate, non-relapse mortality, relapse, overall survival, adverse events (infection, neurotoxicity, cytokine release syndrome, B-cell aplasia, graft versus host disease, other types will be grouped by organ system affected and severity)</p> <p>Partial/ unclear = <math>\geq 1</math> secondary outcomes (listed in OUR protocol) were reported</p> <p>No = None of the outcomes listed in OUR protocol were reported.</p>                                                   | Yes              |
|                                                                                                                                                                                                                                                                                                                                                                                                                                                                                                                                                                                                                                                                                      | Partial/ unclear |
|                                                                                                                                                                                                                                                                                                                                                                                                                                                                                                                                                                                                                                                                                      | No               |
| <p>Were the relevant outcome measures made before and after the intervention?</p> <p>Yes = The relevant outcome measures were made pre- and post-intervention; or the baseline measurements were not possible (ex. death).</p> <p>Partial/ unclear = The study did not report when the outcome measures were made.</p> <p>No = The outcome measures were only made post-intervention.</p>                                                                                                                                                                                                                                                                                            | Yes              |
|                                                                                                                                                                                                                                                                                                                                                                                                                                                                                                                                                                                                                                                                                      | Partial/ unclear |

|                                                                                                                                                                                                                                                                                                                                                                                                                                                                                              |                  |
|----------------------------------------------------------------------------------------------------------------------------------------------------------------------------------------------------------------------------------------------------------------------------------------------------------------------------------------------------------------------------------------------------------------------------------------------------------------------------------------------|------------------|
|                                                                                                                                                                                                                                                                                                                                                                                                                                                                                              | No               |
| The study does not perform selective outcome reporting.<br>Yes = The study protocol is registered and all of the study's pre-specified outcomes of interest were stated in the methods section.<br>Partial/ unclear = Either study protocol registered or the study's pre-specified outcomes of interest were stated in the methods section.<br>No = No study protocol registered and none of the study's pre-specified outcomes of interest were stated in the methods section.             | Yes              |
|                                                                                                                                                                                                                                                                                                                                                                                                                                                                                              | Partial/unclear  |
|                                                                                                                                                                                                                                                                                                                                                                                                                                                                                              | No               |
| Were details of the statistical tests reported?<br>Yes = The statistical tests were reported in the study.<br>Partial/unclear = Statistical tests only partially described or reported elsewhere (e.g previous paper, or protocol).<br>No = The statistical tests were not described in the study.<br>N/A = N of 1 study.                                                                                                                                                                    | Yes              |
|                                                                                                                                                                                                                                                                                                                                                                                                                                                                                              | Partial/unclear  |
|                                                                                                                                                                                                                                                                                                                                                                                                                                                                                              | No               |
|                                                                                                                                                                                                                                                                                                                                                                                                                                                                                              | N/A              |
| Was follow-up period reported?<br>Yes = follow-up information was reported.<br>No = Length of follow-up was not reported.                                                                                                                                                                                                                                                                                                                                                                    | Yes              |
|                                                                                                                                                                                                                                                                                                                                                                                                                                                                                              | No               |
| Did the study provide estimates of random variability in the data analysis of relevant outcomes?<br>Yes = Estimates of the random variability (ex. SE, SD, CI) were reported for all relevant outcomes and/or could be calculated from the raw data.<br>Partial/ unclear = Estimates if the random variability were reported for some, but not all relevant outcomes.<br>No = Estimates of the random variability were not reported for any of the relevant outcomes.<br>N/A = N of 1 study. | Yes              |
|                                                                                                                                                                                                                                                                                                                                                                                                                                                                                              | Partial/unclear  |
|                                                                                                                                                                                                                                                                                                                                                                                                                                                                                              | No               |
|                                                                                                                                                                                                                                                                                                                                                                                                                                                                                              | N/A              |
| Were the adverse events reported?<br>Includes: Infection, neurotoxicity, cytokine release syndrome, B-cell aplasia, and graft versus host disease.<br>Yes = All adverse events were reported.<br>Partial/ unclear = Unclear if all the adverse events were reported.<br>No = No information about adverse events reported.                                                                                                                                                                   | Yes              |
|                                                                                                                                                                                                                                                                                                                                                                                                                                                                                              | Partial/ unclear |
|                                                                                                                                                                                                                                                                                                                                                                                                                                                                                              | No               |

|                                                                                                                                                                                                                                                                                                                                                                                                                                  |                  |
|----------------------------------------------------------------------------------------------------------------------------------------------------------------------------------------------------------------------------------------------------------------------------------------------------------------------------------------------------------------------------------------------------------------------------------|------------------|
| <p>Were both competing interests and sources of support for the study reported?</p> <p>Yes = Both competing interests and sources of support (financial or other) received for the study were reported; or the absence of support was acknowledged.</p> <p>Partial/ unclear = Either the competing interest or source of support was reported.</p> <p>No = Neither competing interests nor sources of support were reported.</p> | Yes              |
|                                                                                                                                                                                                                                                                                                                                                                                                                                  | Partial/ unclear |
|                                                                                                                                                                                                                                                                                                                                                                                                                                  | No               |
